# Supplementary material
Source: PubMed Central journal article supplement (PMC6645974)

# Supporting information

Indium/Gallium Maltolate effects on human breast carcinoma cells: *in vitro*  
investigation on cytotoxicity and synergism with Mitoxantrone.

Daniele Merli<sup>1\*</sup>, Antonella Profumo<sup>1</sup>, Nora Bloise<sup>2,3</sup>, Giulia Risi<sup>4</sup>, Stefano Momentè<sup>1</sup>, Lucia Cucca<sup>1</sup>,  
Livia Visai<sup>2,3\*</sup>

<sup>1</sup> Department of Chemistry, University of Pavia, Via Taramelli 12, 27100 - Pavia, Italy

<sup>2</sup> Molecular Medicine Department (DMM), Center for Health Technologies (CHT), UdR INSTM,  
University of Pavia, Viale Taramelli 3/B - 27100 Pavia, Italy

<sup>3</sup> Department of Occupational Medicine, Toxicology and Environmental Risks, Istituti Clinici  
Scientifici Maugeri, IRCCS, Via S. Boezio, 28 - 27100 Pavia, Italy

<sup>4</sup> Istituto di ricerche chimiche e biochimiche G. Ronzoni Via Colombo 81, -20133 Milano, Italy

*Corresponding authors:*

\* Daniele Merli, Department of Chemistry, University of Pavia, Via Taramelli 12, 27100, Pavia,  
Italy

E-mail: [daniele.merli@unipv.it](mailto:daniele.merli@unipv.it)

\* Livia Visai, Molecular Medicine Department (DMM), Viale Taramelli 3/B - 27100 Pavia, Italy

E-mail: [livia.visai@unipv.it](mailto:livia.visai@unipv.it)

**Table S1.** Representative viability percent of both MDA-MB-231 and NIH-3T3 cell types treated with GaMal or InMal (5  $\mu\text{M}$  and 150  $\mu\text{M}$ ) or MTX (10 or 200  $\text{ng/mL}^{-1}$ ) for 24 and 144 h, respectively. Data are presented as control percent (untreated cells) set as 100 %. The mean values  $\pm$  SEM ( $n = 3$ ,  $p < 0.05$ ). of results from three experiments are also reported.

| Metal complexes or drug | Concentration      | Viability percent MDA-MB-231 |             | Viability percent NIH-3T3 |            |
|-------------------------|--------------------|------------------------------|-------------|---------------------------|------------|
|                         |                    | 24 h                         | 144 h       | 24 h                      | 144 h      |
| GaMal                   | 5 $\mu\text{M}$    | 127 $\pm$ 3                  | 114 $\pm$ 1 | 118 $\pm$ 2               | 71 $\pm$ 2 |
|                         | 150 $\mu\text{M}$  | 86 $\pm$ 1                   | 8 $\pm$ 3   | 56 $\pm$ 2                | 28 $\pm$ 1 |
| InMal                   | 5 $\mu\text{M}$    | 110 $\pm$ 4                  | 104 $\pm$ 1 | 93 $\pm$ 1                | 84 $\pm$ 1 |
|                         | 150 $\mu\text{M}$  | 100 $\pm$ 2                  | 5 $\pm$ 1   | 76 $\pm$ 1                | 18 $\pm$ 2 |
| MTX                     | 10 $\text{ng/mL}$  | 91 $\pm$ 3                   | 68 $\pm$ 3  | 64 $\pm$ 8%               | 27 $\pm$ 3 |
|                         | 200 $\text{ng/mL}$ | 91 $\pm$ 2                   | 41 $\pm$ 1  | 72 $\pm$ 3%               | 23 $\pm$ 4 |

**Table S2.** Representative viability percent of both MDA-MB-231 and NIH-3T3 cell types treated with two concentrations (5  $\mu\text{M}$  or 150  $\mu\text{M}$ ) of GaMal or InMal in the co-presence of MTX (10 or 200  $\text{ngmL}^{-1}$ ) for 24 h and 144 h, respectively. Data are presented as control percent (untreated cells) set as 100 %. The mean values  $\pm$  SEM ( $n = 3$ ,  $p < 0.05$ ) of results from three experiments are also reported.

| Metal complexes | Concentration     | Co-incubation with drug | Viability percent MDA-MB-231 |            | Viability percent NIH3T3 |            |
|-----------------|-------------------|-------------------------|------------------------------|------------|--------------------------|------------|
|                 |                   |                         | 24 h                         | 144 h      | 24 h                     | 144 h      |
| GaMal           | 5 $\mu\text{M}$   | + MTX 10 ng/mL          | 95 $\pm$ 7                   | 95 $\pm$ 1 | 103 $\pm$ 12             | 42 $\pm$ 6 |
|                 | 150 $\mu\text{M}$ |                         | 87 $\pm$ 6                   | 40 $\pm$ 2 | 85 $\pm$ 4               | 33 $\pm$ 6 |
| InMal           | 5 $\mu\text{M}$   | + MTX 10 ng/mL          | 124 $\pm$ 2                  | 95 $\pm$ 5 | 80 $\pm$ 1               | 34 $\pm$ 3 |
|                 | 150 $\mu\text{M}$ |                         | 75 $\pm$ 5                   | 8 $\pm$ 1  | 69 $\pm$ 6               | 16 $\pm$ 6 |
| GaMal           | 5 $\mu\text{M}$   | + MTX 200 ng/mL         | 85 $\pm$ 1                   | 43 $\pm$ 2 | 103 $\pm$ 12             | 33 $\pm$ 5 |
|                 | 150 $\mu\text{M}$ |                         | 83 $\pm$ 2                   | 25 $\pm$ 2 | 85 $\pm$ 4               | 38 $\pm$ 3 |
| InMal           | 5 $\mu\text{M}$   | + MTX 200 ng/mL         | 80 $\pm$ 2                   | 42 $\pm$ 2 | 80 $\pm$ 6               | 27 $\pm$ 4 |
|                 | 150 $\mu\text{M}$ |                         | 65 $\pm$ 3                   | 12 $\pm$ 3 | 65 $\pm$ 4               | 25 $\pm$ 3 |

**Table S3.** Representative viability percent of both MDA-MB-231 and NIH-3T3 cell types pretreated with two concentrations (5  $\mu\text{M}$  or 150  $\mu\text{M}$ ) of GaMal or InMal for 24 h, followed by medium removal and supplementation with MTX (10  $\text{ngmL}^{-1}$ ) for 24 h and 144 h respectively. Data are presented as control percent (untreated cells) set as 100 %. The mean values  $\pm$  SEM ( $n = 3$ ,  $p < 0.05$ ) from three experiments are also reported.

| Metal complexes pretreatment for 24 h | Concentration     | Culture medium removal and replacement with | Viability percent MDA-MB-231 |             | Viability percent NIH-3T3 |             |
|---------------------------------------|-------------------|---------------------------------------------|------------------------------|-------------|---------------------------|-------------|
|                                       |                   |                                             | 24 h                         | 144 h       | 24 h                      | 144 h       |
| GaMal                                 | 5 $\mu\text{M}$   | Fresh medium                                | 46 $\pm$ 1                   | 85 $\pm$ 5  | 81 $\pm$ 1                | 109 $\pm$ 4 |
|                                       | 150 $\mu\text{M}$ |                                             | 41 $\pm$ 3                   | 76 $\pm$ 4  | 82 $\pm$ 1                | 75 $\pm$ 2  |
|                                       | 5 $\mu\text{M}$   | Addition of MTX 10 ng/mL                    | 93 $\pm$ 1                   | 120 $\pm$ 2 | 42 $\pm$ 4                | 38 $\pm$ 2  |
|                                       | 150 $\mu\text{M}$ |                                             | 46 $\pm$ 6                   | 44 $\pm$ 6  | 36 $\pm$ 2                | 33 $\pm$ 3  |
| InMal                                 | 5 $\mu\text{M}$   | Fresh medium                                | 77 $\pm$ 3                   | 100 $\pm$ 2 | 69 $\pm$ 1                | 88 $\pm$ 3  |
|                                       | 150 $\mu\text{M}$ |                                             | 72 $\pm$ 1                   | 60 $\pm$ 5  | 77 $\pm$ 4                | 87 $\pm$ 7  |
|                                       | 5 $\mu\text{M}$   | Addition of MTX 10 ng/mL                    | 82 $\pm$ 1                   | 81 $\pm$ 3  | 70 $\pm$ 2                | 57 $\pm$ 2  |
|                                       | 150 $\mu\text{M}$ |                                             | 87 $\pm$ 1                   | 33 $\pm$ 1  | 62 $\pm$ 1                | 54 $\pm$ 3  |

**Table S4.** Representative viability percent of both MDA-MB-231 and NIH-3T3 cell types pretreated with MTX ( $10 \text{ ng mL}^{-1}$ ) for 24 h, followed by culture medium removal and replacement with two concentrations (5  $\mu\text{M}$  and 150  $\mu\text{M}$ ) of GaMal or InMal for 24 and 144 h, respectively. Data are presented as control percent (untreated cells) set as 100 %. The mean values  $\pm$  SEM ( $n = 3$ ,  $p < 0.05$ ) from three experiments are also reported.

| Drug pretreatment for 24 h | Concentration | Culture medium removal and replacement with | Viability percent MDA-MB-231 |            | Viability percent NIH-3T3 |            |
|----------------------------|---------------|---------------------------------------------|------------------------------|------------|---------------------------|------------|
|                            |               |                                             | 24 h                         | 144 h      | 24 h                      | 144 h      |
| MTX                        | 10 ng/mL      | Fresh medium                                | 98 $\pm$ 4                   | 45 $\pm$ 2 | 58 $\pm$ 1                | 17 $\pm$ 1 |
|                            |               | Addition of 5 $\mu\text{M}$ GaMal           | 55 $\pm$ 7                   | 53 $\pm$ 1 | 97 $\pm$ 1                | 60 $\pm$ 1 |
|                            |               | Addition of 150 $\mu\text{M}$ GaMal         | 49 $\pm$ 9                   | 34 $\pm$ 1 | 75 $\pm$ 2                | 53 $\pm$ 2 |
|                            |               | Addition of 5 $\mu\text{M}$ InMal           | 86 $\pm$ 1                   | 82 $\pm$ 9 | 45 $\pm$ 3                | 13 $\pm$ 1 |
|                            |               | Addition of 150 $\mu\text{M}$ InMal         | 82 $\pm$ 2                   | 6 $\pm$ 1  | 40 $\pm$ 3                | 17 $\pm$ 5 |

**Figure S1.** a)  $^{13}\text{C}$ -NMR and b)  $^1\text{H}$ -NMR spectra of gallium maltolate in  $d_6$ -DMSO. Signal at  $\delta=40$  ppm in a) is attributed to DMSO. Signals at  $\delta = 2.5$  ppm and 3.2 ppm in b) are attributed to DMSO and water respectively. For other signals attribution see the text.

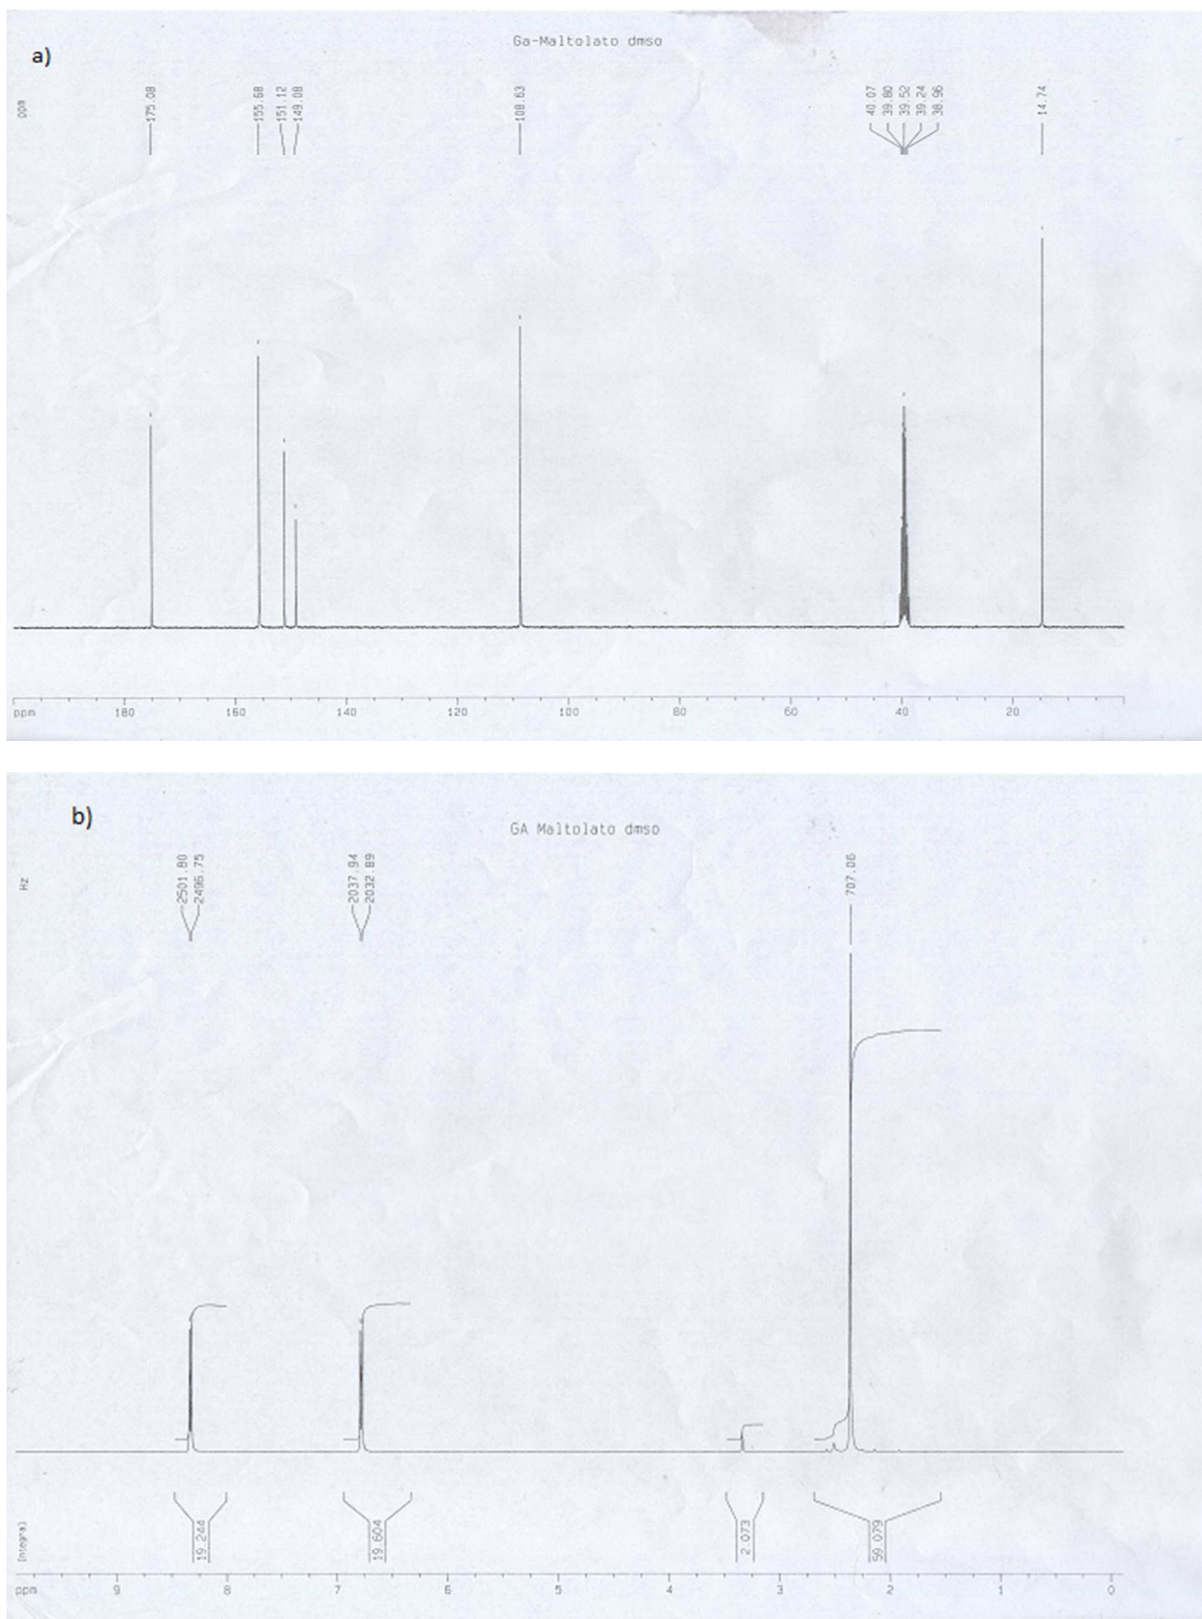

**Figure S2.** a)  $^{13}\text{C}$ -NMR and b)  $^1\text{H}$ -NMR spectra of indium maltolate in  $d_6$ -DMSO. Signal at  $\delta=40$  ppm in a) is attributed to DMSO. Signals at  $\delta = 2.5$  ppm and 3.2 ppm in b) are attributed to DMSO and water respectively. For other signals attribution see the text.

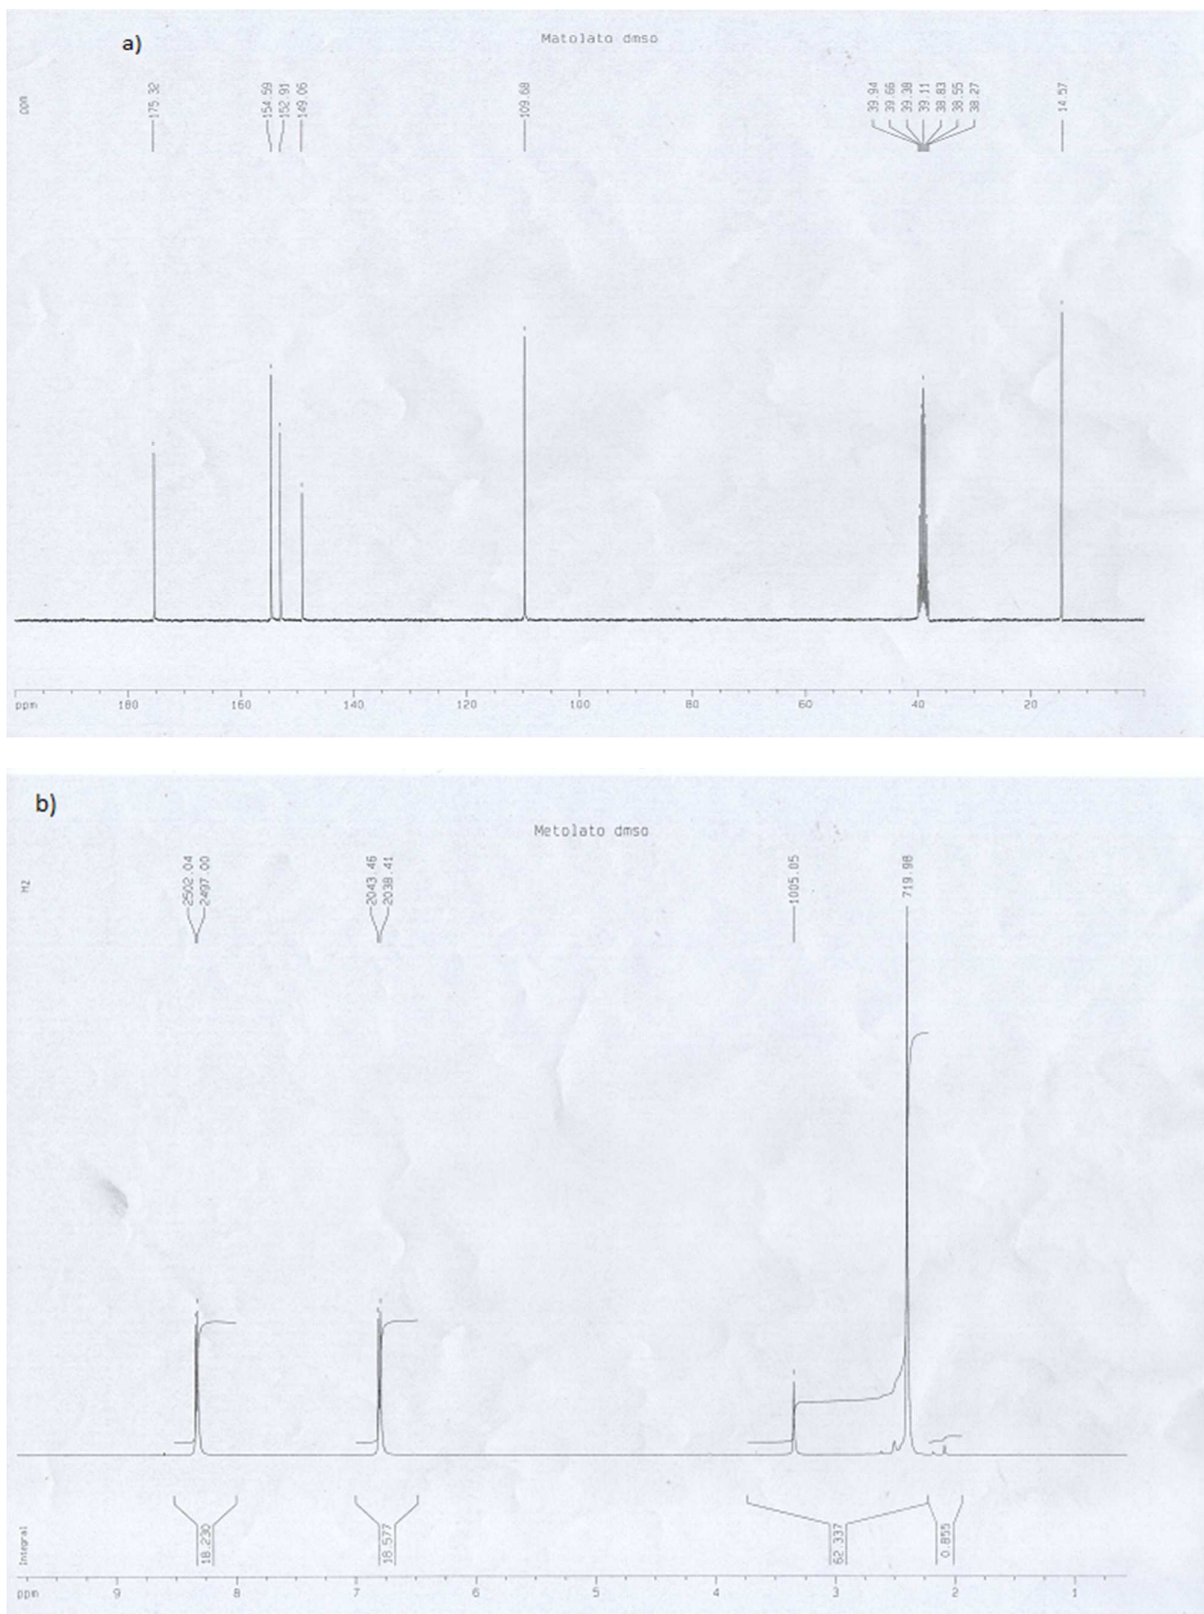

**Figure S3.** IR spectra of a) gallium maltolate b) indium maltolate and c) maltol.

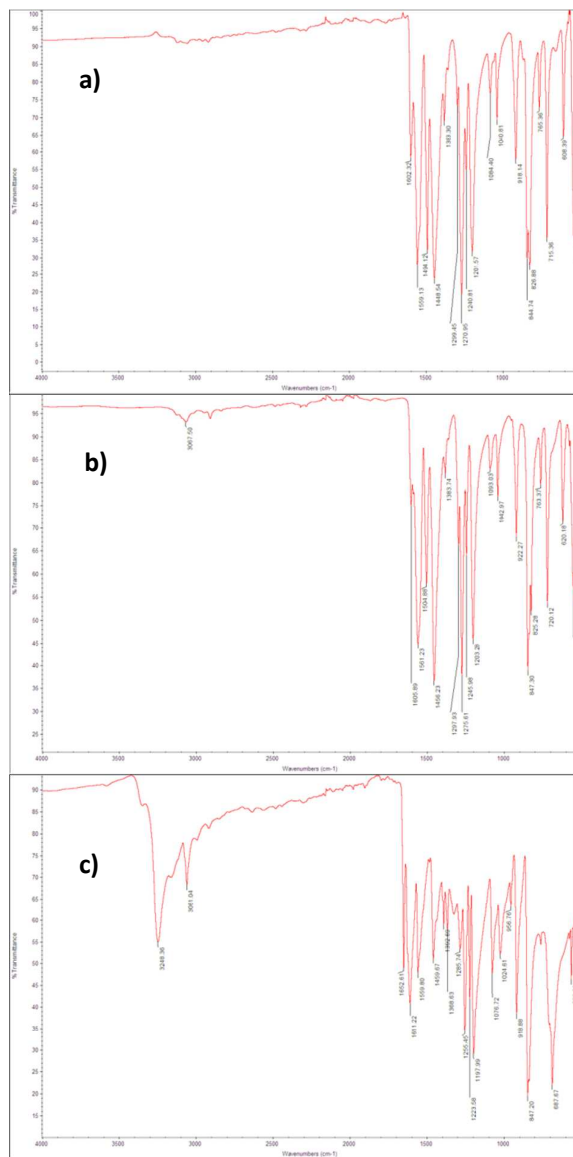



**Figure S4.** Representative viability percent of both MDA-MB-231 and NIH-3T3 cell types pretreated with MTX ( $10 \text{ ng mL}^{-1}$ ) for 24 h, followed by culture medium removal and replacement with two concentrations ( $5 \text{ }\mu\text{M}$  or  $150 \text{ }\mu\text{M}$ ) of GaMal or InMal for 24 and 144 h, respectively. The experiments were performed with (a, d)  $100 \text{ }\mu\text{M}$ , (b, e)  $250 \text{ }\mu\text{M}$ , (c, f)  $500 \text{ }\mu\text{M}$  iron (III) citrate. Data are presented as control percent (untreated cells) set as 100 %. The mean values  $\pm$  SEM from three experiments are also reported ( $n = 3$ ,  $p < 0.05$ ).

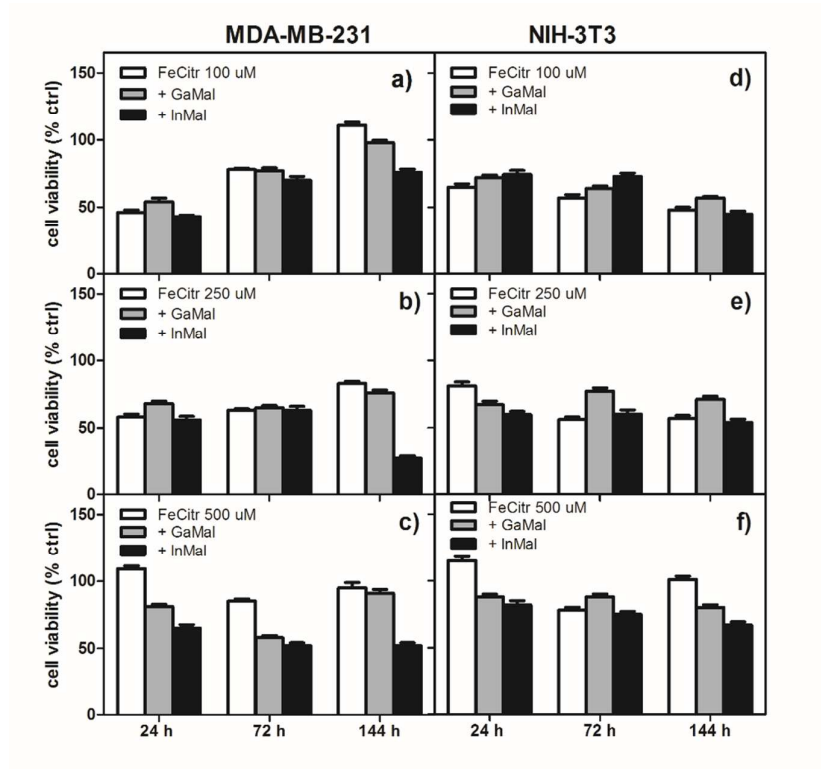

Supplement: ao7b02026_si_001.pdf [file ao7b02026_si_001.pdf]
